# Supplementary material
Source: publisher figshare collection journal article supplement (https://gsapubs.figshare.com/ndownloader/files/23307521)
Supplement: Supplementary file 1 [file 23307521]

## 280-million-year old fossil starch reveals early plant-animal mutualism

**Feng Liu<sup>1,2,\*</sup>, Benjamin Bomfleur<sup>3</sup>, Huiping Peng<sup>1,4</sup>, Quan Li<sup>5</sup>, Hans Kerp<sup>3</sup>,  
Huaicheng Zhu<sup>1,2</sup>**

<sup>1</sup> *Nanjing Institute of Geology and Palaeontology, Chinese Academy of Sciences,  
Nanjing 210008, China*

<sup>2</sup> *State Key Laboratory of Palaeobiology and Stratigraphy, Chinese Academy of  
Sciences, Nanjing 210008, China*

<sup>3</sup> *Palaeobotany Research Group, University of Münster, Münster, Heisenbergstr. 2,  
48143, Münster, Germany*

<sup>4</sup> *University of Science and Technology of China, Hefei 230000, China*

<sup>5</sup> *Key Laboratory of Land Surface Pattern and Simulation, Institute of Geographic  
Sciences and Natural Resources Research, Chinese Academy of Sciences, Beijing  
10000, China*

DATA REPOSITORY

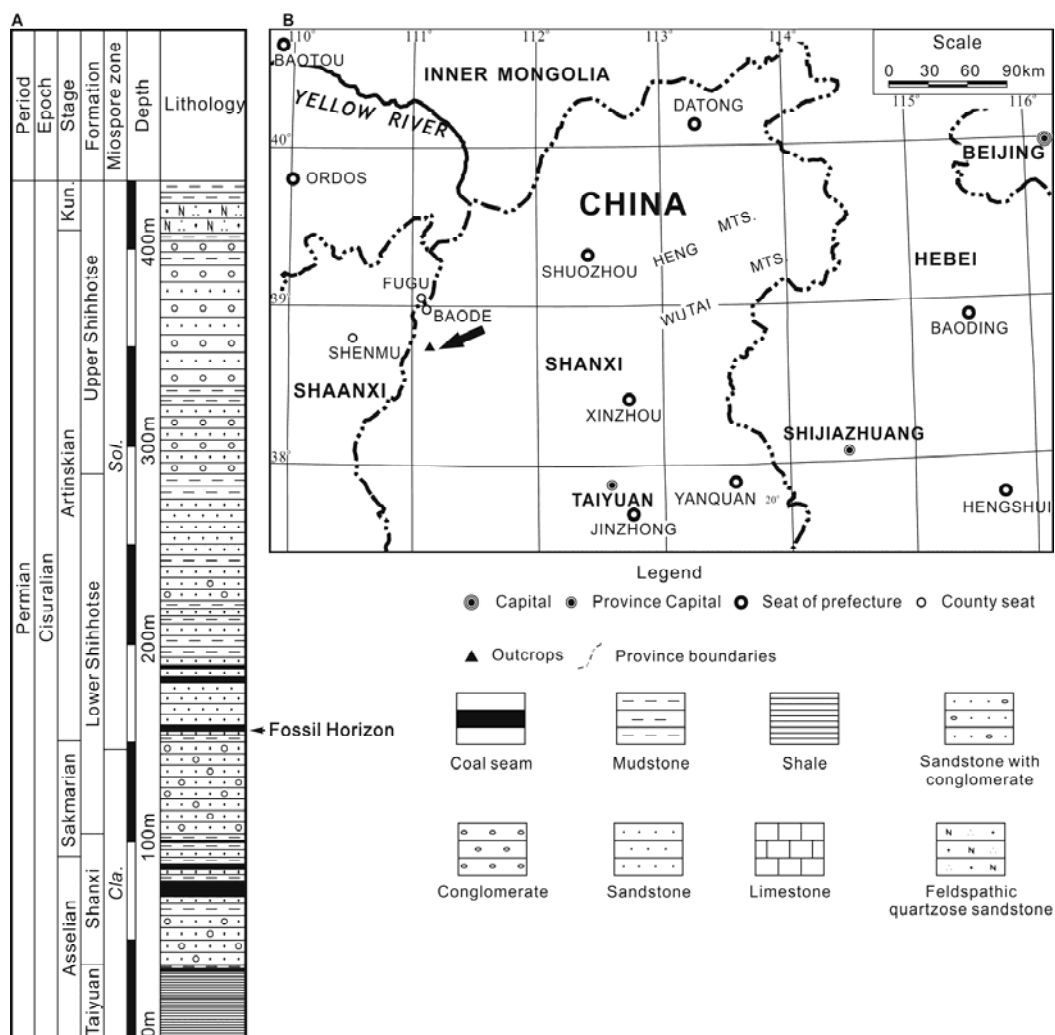

Figure DR1. (A) Lithostratigraphy of the Cisuralian deposits of the Baode section, North China. Palynological biozones follow Liu, Zhu and Ouyang (2015). Arrow points to the fossil horizon. Kun = Kungurian.

(B) Sketch map showing the location of the studied Baode section, Baode County, Shanxi Province (modified from Liu, Zhu and Ouyang (2015)). Arrow points to the Baode section in the Baode County.

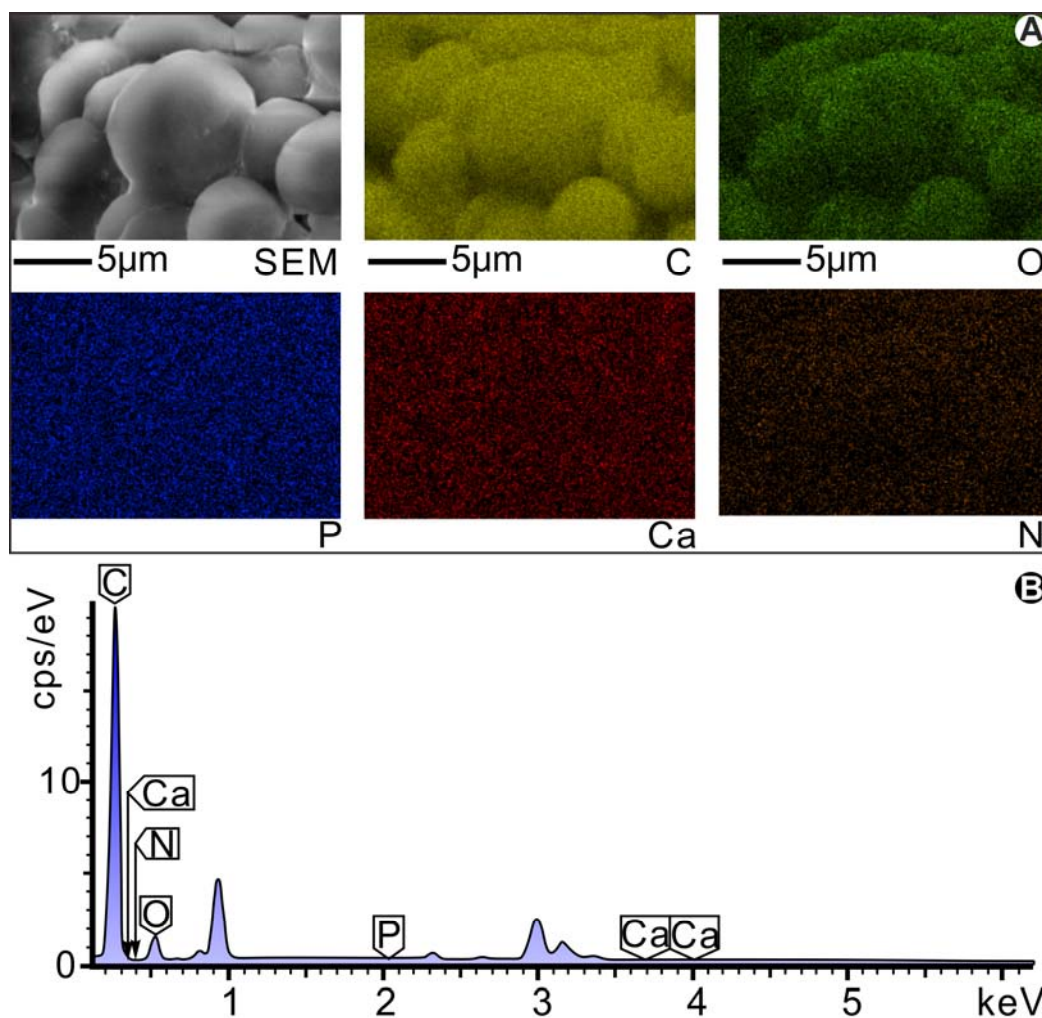

Figure DR2. Energy-dispersive X-ray spectroscopy analysis (A) showing the distribution of Carbon (C), Oxygen (O), Phosphorus (P), Calcium (Ca) and Nitrogen (N), on the surface of granular material (scanning electron microscopic, SEM). Spectra showing the main components present in granular material are Carbon and Oxygen (B), further demonstrating that these granular materials are starch grains.

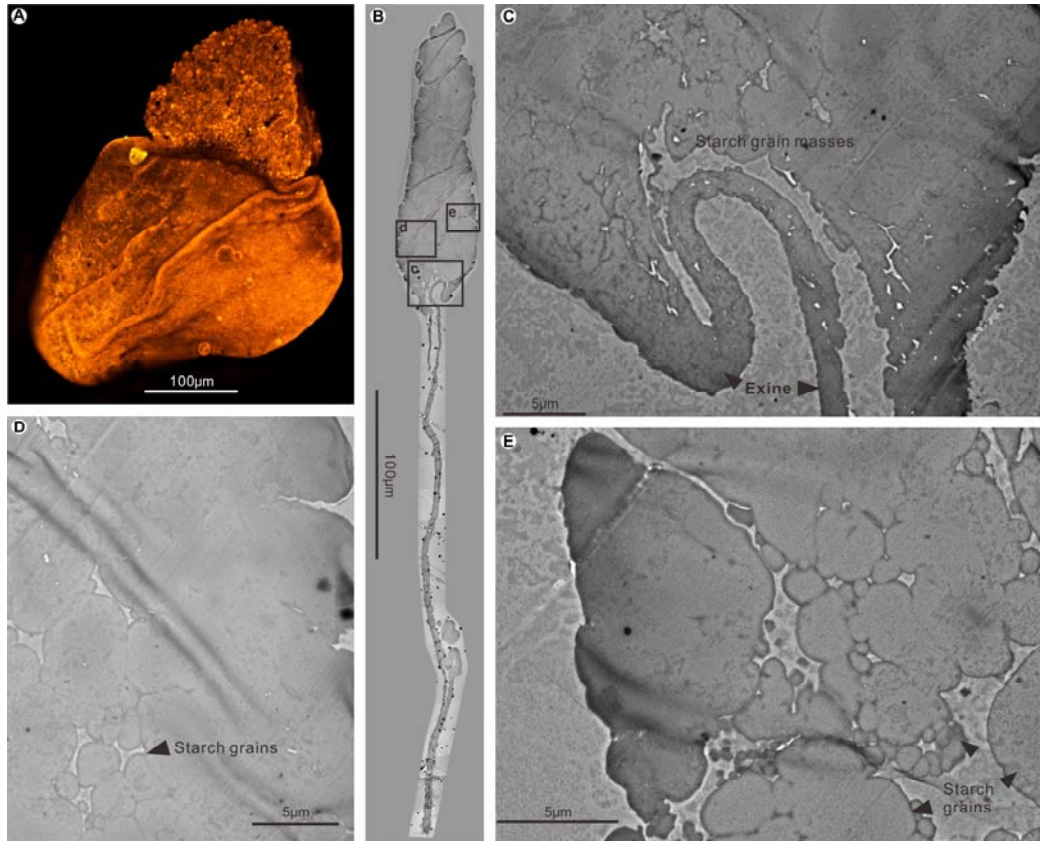

Figure DR3. Fluorescence microscopic and transmission electron microscopic (TEM) images of *Lagenicula*-type megaspore with starch grains on its gula. (Images in black rectangular are enlarged in pictures with the same number). (A) Fluorescence-microscopic image of megaspore used for TEM analysis; (B) Composite image of section encompassing the entire megaspore; (C) Details of the opened proximal surface of megaspore. (D and E). Details of the starch grains with different shapes and sizes on the gula.
